# Supplementary material for: 3D-printing of attapulgite monoliths with superior low-temperature selective catalytic reduction activity: the influence of thermal treatment
Source: Royal Society of Chemistry journal article supplement (doi:10.1039/d3nj04023b), 2023-12-07
Supplement: d3nj04023b1.pdf [file d3nj04023b1.pdf]

# **3D-printing of attapulgite monoliths with superior low-temperature selective catalytic reduction activity: The influence of thermal treatment**

Jie Zhu <sup>a,b</sup>, Jiangtao Yu <sup>a</sup>, Linhua Zhu <sup>c</sup>, Xiaoxiao Yu <sup>b</sup>, Jixing Liu <sup>a\*</sup>, Yanhong Chao <sup>a,b</sup>, Jingzhou Yin <sup>d</sup>, Peiwen Wu <sup>a\*</sup>, Jian Liu <sup>b</sup>, Wenshuai Zhu <sup>a,b\*</sup>

<sup>a</sup> *School of Chemistry and Chemical Engineering, Jiangsu University, Zhenjiang 212013, P.R. China*

<sup>b</sup> *College of Chemical Engineering and Environment, State Key Laboratory of Heavy Oil Processing, China University of Petroleum-Beijing, Beijing 102249, P.R. China*

<sup>c</sup> *College of Chemistry and Chemical Engineering, Hainan Normal University, Haikou 571158, P.R. China*

<sup>d</sup> *School of Chemistry and Chemical Engineering, Huaiyin Normal University, Huai'an 223001, P.R. China*

\* Corresponding author

E-mail address: [jxliu0804@ujs.edu.cn](mailto:jxliu0804@ujs.edu.cn) (J. Liu); [wupeiwen@ujs.edu.cn](mailto:wupeiwen@ujs.edu.cn) (P. Wu); [zhuws@cup.edu.cn](mailto:zhuws@cup.edu.cn) (W. Zhu)

## Supplementary material

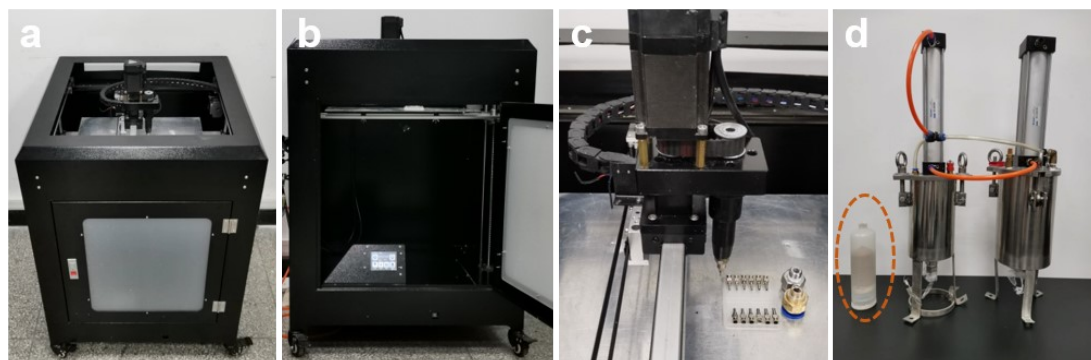

**Fig. S1.** The optical photos of home-made screw extrusion printer for direct ink writing: (a) The top view of the extrusion printer, (b) the front view of the extrusion printer, (c) the print nozzle, (d) the cartridges with different print capacities.

**Table S1.** Formulations of the designed attapulgite slurry for direct ink writing.

| Formulation | ATP (g) | DW (g) | ATP/ DW | Solid content (%) |
|-------------|---------|--------|---------|-------------------|
| 1           | 150     | 110    | 1.36    | 57.7              |
| 2           | 150     | 115    | 1.30    | 56.6              |
| 3           | 150     | 120    | 1.25    | 55.6              |
| 4           | 150     | 125    | 1.20    | 54.5              |
| 5           | 150     | 130    | 1.15    | 53.6              |
| 6           | 150     | 135    | 1.11    | 52.6              |
| 7           | 150     | 140    | 1.07    | 51.7              |
| 8           | 150     | 145    | 1.03    | 50.8              |
| 9           | 150     | 150    | 1.00    | 50.0              |

**Table S2.** Formulations of attapulgite slurry with adding alumina.

| Formulation | ATP (g) | DW (g) | Al <sub>2</sub> O <sub>3</sub> (g) | Al <sub>2</sub> O <sub>3</sub> in total powder (wt.%) | Solid content (%) |
|-------------|---------|--------|------------------------------------|-------------------------------------------------------|-------------------|
| 7           | 150     | 140    | 0                                  | 0                                                     | 51.7              |
| 10          | 150     | 140    | 5                                  | 3                                                     | 52.5              |
| 11          | 150     | 140    | 10                                 | 6                                                     | 53.3              |
| 12          | 150     | 140    | 15                                 | 9                                                     | 54.1              |

**Table S3.** Relevant printing parameters of the screw-based extrusion printer for direct ink writing process.

| Parameter         | Set value   | Description                                                       |
|-------------------|-------------|-------------------------------------------------------------------|
| Air pump pressure | 0.4-0.5 MPa | The slurry stably extruded from the screw under constant pressure |
| Nozzle diameter   | 1.6 mm      | Diameter size of print nozzle                                     |
| Layer thickness   | 0.3 mm      | Print thickness per layer                                         |
| Line width        | 1.0 mm      | Printing nozzle routing width                                     |
| Printing speed    | 4-5 mm/s    | Length of extrusion from nozzle per unit time                     |

**Table S4.** XRF analysis of main components of attapulgite raw materials.

| Entry | Oxide form                     | Content (%) | Standard error |
|-------|--------------------------------|-------------|----------------|
| 1     | SiO <sub>2</sub>               | 61.47       | 0.24           |
| 2     | Al <sub>2</sub> O <sub>3</sub> | 17.10       | 0.19           |
| 3     | MgO                            | 7.39        | 0.13           |
| 4     | Fe <sub>2</sub> O <sub>3</sub> | 6.55        | 0.12           |
| 5     | CaO                            | 3.12        | 0.09           |
| 6     | K <sub>2</sub> O               | 2.31        | 0.08           |
| 7     | TiO <sub>2</sub>               | 0.876       | 0.044          |
| 8     | P <sub>2</sub> O <sub>5</sub>  | 0.519       | 0.0026         |
| 9     | MnO                            | 0.181       | 0.009          |
| 10    | Na <sub>2</sub> O              | 0.141       | 0.007          |

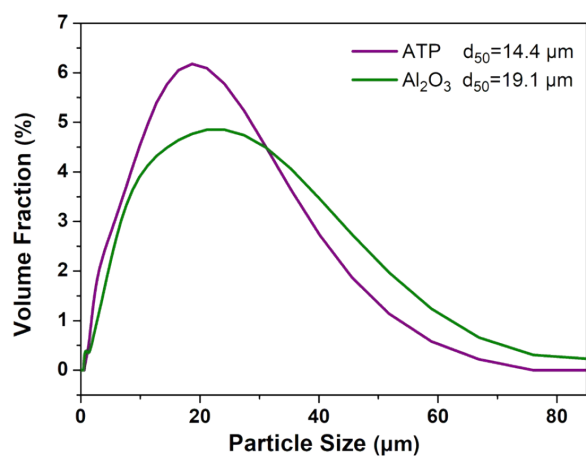

**Fig. S2.** Particle size distribution of attapulgite and alumina powder.

**Table S5.** Fineness characteristics of printing raw materials.

| Entry                          | $d_{10}$ ( $\mu\text{m}$ ) | $d_{50}$ ( $\mu\text{m}$ ) | $d_{90}$ ( $\mu\text{m}$ ) | $D [3,2]$ ( $\mu\text{m}$ ) | $D [4,3]$ ( $\mu\text{m}$ ) |
|--------------------------------|----------------------------|----------------------------|----------------------------|-----------------------------|-----------------------------|
| ATP                            | 3.3                        | 14.4                       | 35.6                       | 7.87                        | 17.3                        |
| Al <sub>2</sub> O <sub>3</sub> | 4.3                        | 19.1                       | 145.0                      | 9.01                        | 41.9                        |

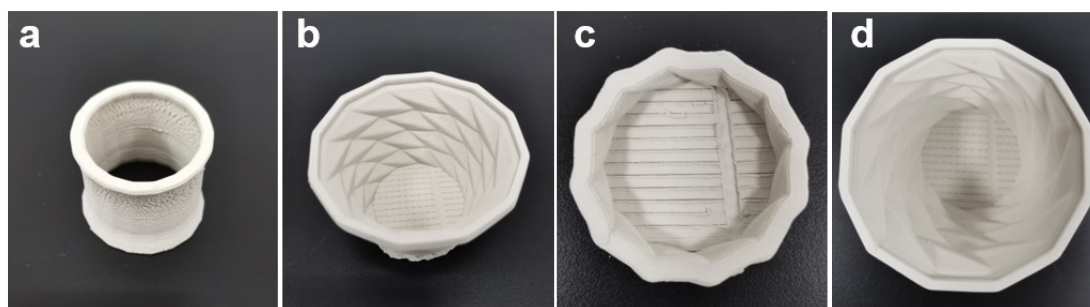

**Fig. S3.** The optical photos for various fine monolithic structures through direct ink writing of designed attapulgite slurry.

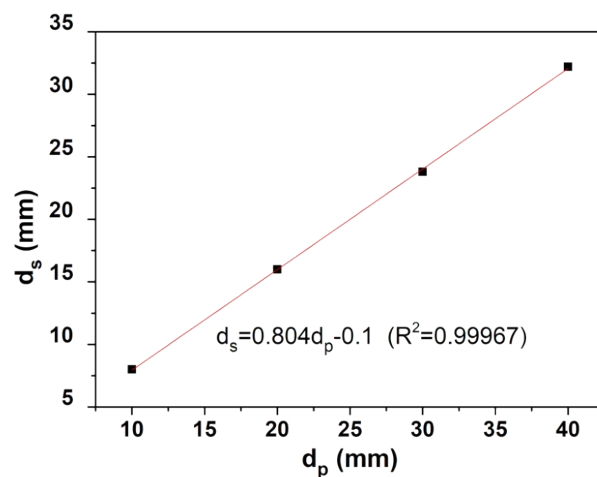

**Fig. S4.** The relationship between the printed diameter ( $d_p$ ) of different cylindrical structures and the solidified retention diameter ( $d_s$ ) after solidification.

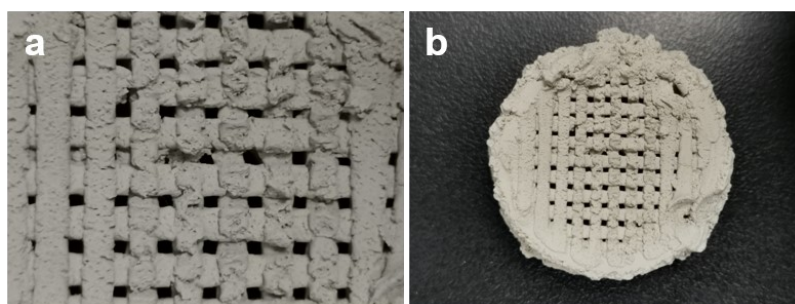

**Fig. S5.** The optical photos for the DIW sample of the addition of 9 wt.% alumina with rough printing effect.

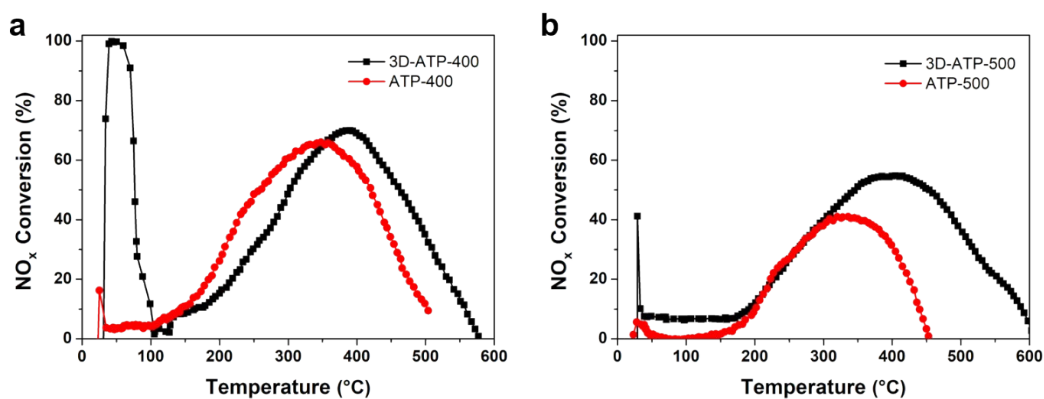

**Fig. S6.** Comparison of 3D-ATP-400 (a) and 3D-ATP-500 (b) catalysts with powder catalysts.
